# Supplementary material for: Influences of Illumination Pretreatment on Soybean Oil Activated Clay Bleaching Effects and Soybean Oil Quality Evaluation
Source: MDPI journal article supplement (doi:10.3390/foods12051038), 2023-03-01
Supplement: s1 [file s1]

## Supplementary materials

Figure S1

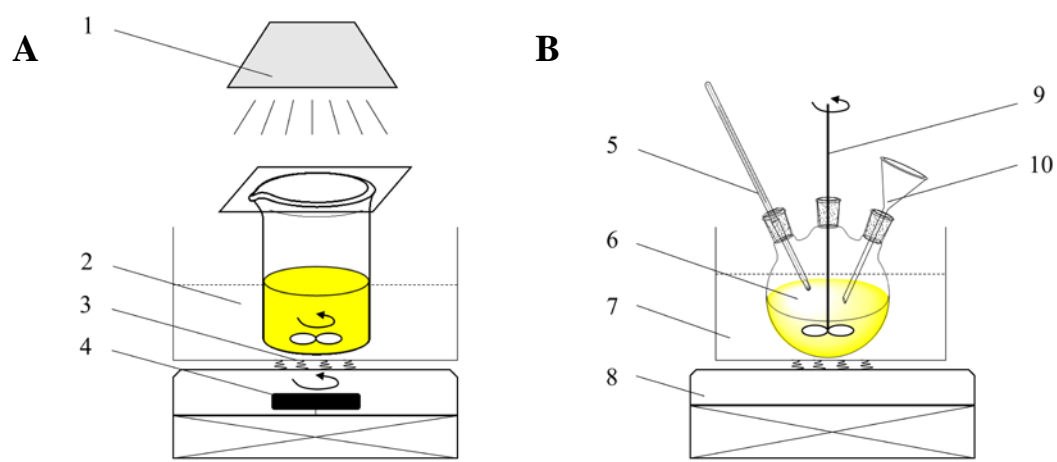

**Figure S1.** The schematic diagram of edible oil illumination pretreatment (A) coupled with active clay bleaching (B) system (1- Xenon light generating system; 2-warm water bath, 3-heat transfer; 4-magnetic stirring generator; 5-temperature sensor; 6-soybean oil; 7-mineral oil bath; 8-heat generator; 9-mechanical stirring; 10-bleaching clay adding).
